# Supplementary material for: Anti-tumor activity of cetuximab plus avelumab in non-small cell lung cancer patients involves innate immunity activation: findings from the CAVE-Lung trial
Source: Springer Nature journal article supplement (doi:10.1186/s13046-022-02332-2), 2022-03-26
Supplement: MOESM4 [file 20259758]

# Supplemental Figure 1

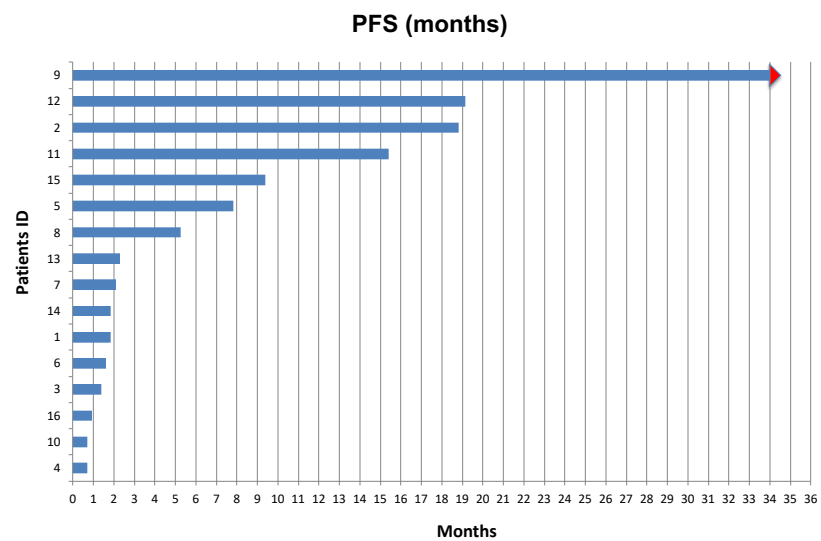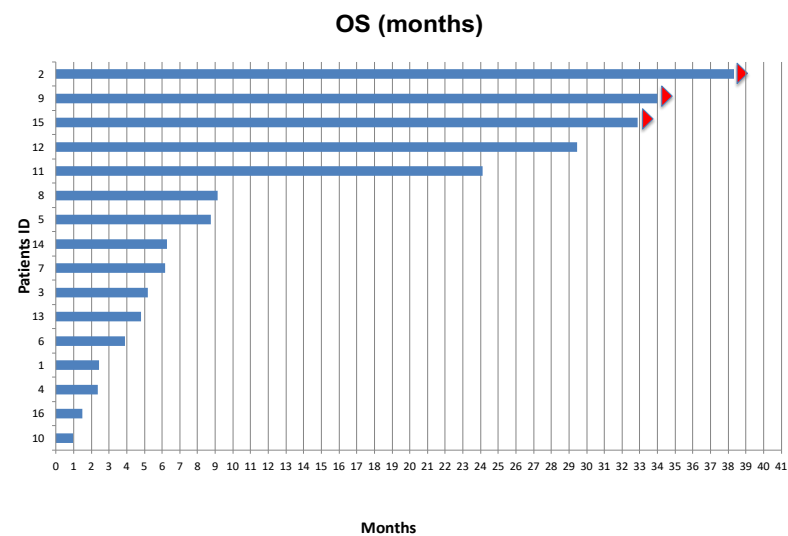

Updated PFS and OS of patients enrolled in CAVE-LUNG trial at data cut-off of November, 30th, 2021
